# Supplementary material
Source: PubMed Central journal article supplement (PMC6589498)
Supplement: Supp_Fig1.pdf [file Supp_Fig1.pdf]

## Supplementary Data

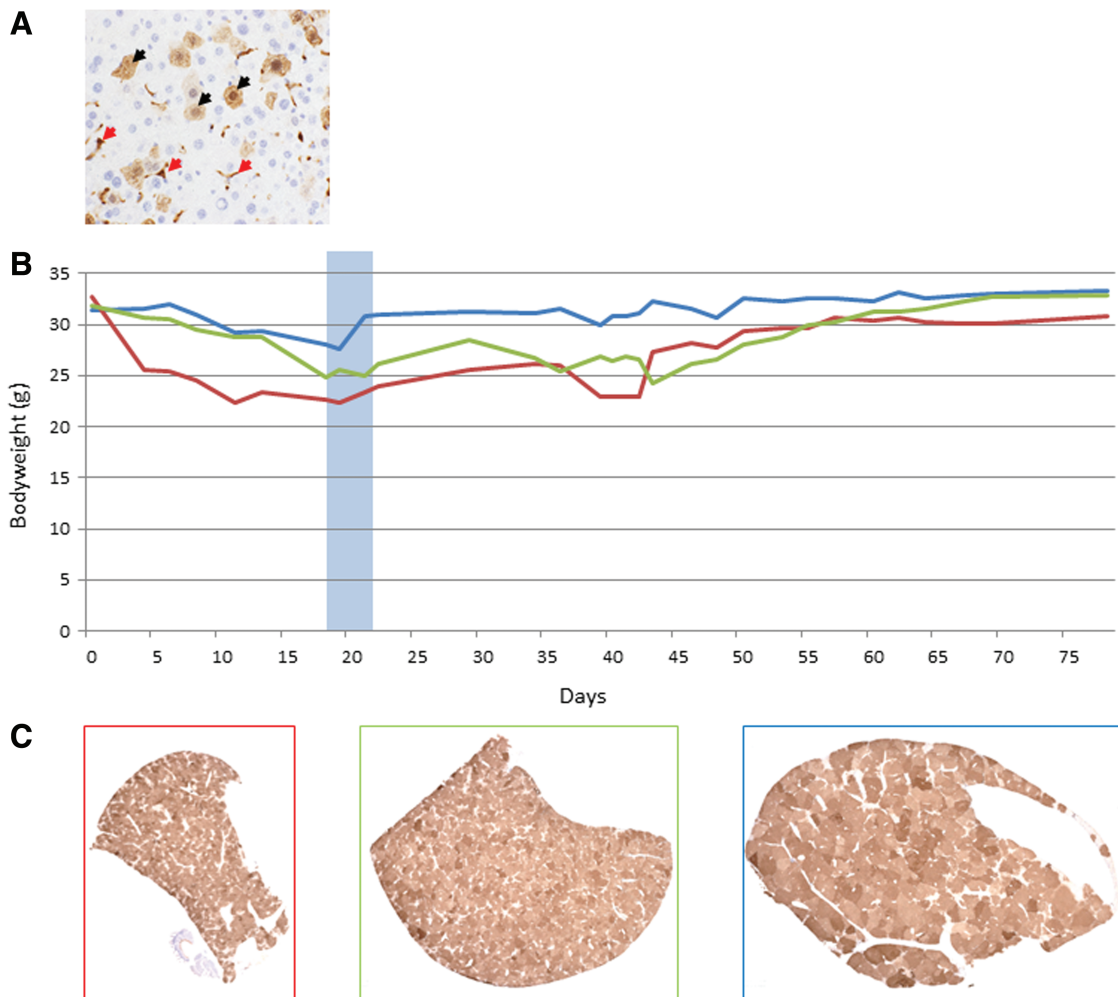

**Supplementary Figure 1.** Transduction and expression of lentiviral vectors in wild type and fumarylacetoacetate hydrolase (Fah)<sup>-/-</sup> mice. **(A)** Immunohistochemistry of wild type mouse liver 1 week after intravenous administration of  $1 \times 10^9$  TU ( $4 \times 10^{10}$  TU/kg) of a lentiviral vector expressing green fluorescent protein under cytomegalovirus promoter to demonstrate initial transduction into hepatocytes (black arrows) as well as Kupffer cells (red arrows). **(B)** Body weight gains in two Fah<sup>-/-</sup> mice administered LV-FAH at  $7 \times 10^{10}$  TU/kg (green and red lines) and one Fah<sup>-/-</sup> mouse administered LV-FAH at  $3 \times 10^{11}$  TU/kg showing a single administration of NTBC (shaded blue bar) prior to achieving 2-(2-nitro-4-trifluoromethylbenzoyl)-1,3-cyclohexanedione (NTBC)-free growth. **(C)** Immunohistochemistry of FAH showing expression of transgene in liver repopulated with FAH-positive hepatocytes (colored outlines correspond to bodyweight graph above).
